# Supplementary material
Source: ML conference proceedings conference paper supplement (https://proceedings.mlr.press/v84/guo18a.html)
Supplement: Supplementary file [file guo18a-supp.pdf]

## A Proof of Theorem 3

Given the setup in Theorem 3, we first restate (Fill, 1991, Theorem 2.1) (note that the norm in (Fill, 1991) is twice the total variation distance):

$$\|P^t(\sigma, \cdot) - \pi\|_{TV}^2 \leq \frac{(1 - \lambda(R(P)))^t}{\pi(\sigma)}. \quad (10)$$

Let  $\lambda := \lambda(R(P))$  and  $T := \log\left(\frac{4e^2}{\pi_{\min}}\right) T_{rel}(P) = \frac{1}{1 - \sqrt{1 - \lambda}} \log\left(\frac{4e^2}{\pi_{\min}}\right)$ . Then it is easy to verify that

$$T \geq \frac{2}{\lambda} \log\left(\frac{2e}{\sqrt{\pi_{\min}}}\right)$$

and by (10), we have that

$$\begin{aligned} \max_{\sigma \in \Omega} \|P^T(\sigma, \cdot) - \pi\|_{TV} &\leq \frac{(1 - \lambda)^{T/2}}{\sqrt{\pi_{\min}}} \\ &\leq \frac{(1 - \lambda)^{\lambda^{-1} \log\left(\frac{2e}{\sqrt{\pi_{\min}}}\right)}}{\sqrt{\pi_{\min}}} \\ &\leq \frac{e^{-\log\left(\frac{2e}{\sqrt{\pi_{\min}}}\right)}}{\sqrt{\pi_{\min}}} \\ &= \frac{1}{2e}. \end{aligned}$$

In other words,

$$T_{mix}(P) \leq T = \log\left(\frac{4e^2}{\pi_{\min}}\right) T_{rel}(P).$$

## B Operator Norms and the Spectral Gap

We also view the transition matrix  $P$  as an operator that mapping functions to functions. More precisely, let  $f$  be a function  $f : \Omega \rightarrow \mathbb{R}$  and  $P$  acting on  $f$  is defined as

$$Pf(x) := \sum_{y \in \Omega} P(x, y) f(y).$$

This is also called the *Markov operator* corresponding to  $P$ . We will not distinguish the matrix  $P$  from the operator  $P$  as it will be clear from the context. Note that  $Pf(x)$  is the expectation of  $f$  with respect to the distribution  $P(x, \cdot)$ . We can regard a function  $f$  as a column vector in  $\mathbb{R}^\Omega$ , in which case  $Pf$  is simply matrix multiplication. Recall (4) and  $P^*$  is also called the *adjoint operator* of  $P$ . Indeed,  $P^*$  is the (unique) operator that satisfies  $\langle f, Pg \rangle_\pi = \langle P^* f, g \rangle_\pi$ . It is easy to verify that if  $P$  satisfies the detailed balanced condition (1), then  $P$  is *self-adjoint*, namely  $P = P^*$ .

The Hilbert space  $L_2(\pi)$  is given by endowing  $\mathbb{R}^\Omega$  with the inner product

$$\langle f, g \rangle_\pi := \sum_{x \in \Omega} f(x) g(x) \pi(x),$$

where  $f, g \in \mathbb{R}^\Omega$ . In particular, the norm in  $L_2(\pi)$  is given by

$$\|f\|_\pi := \langle f, f \rangle_\pi.$$

The spectral gap (2) can be rewritten in terms of the operator norm of  $P$ , which is defined by

$$\|P\|_\pi := \max_{\|f\|_\pi \neq 0} \frac{\|Pf\|_\pi}{\|f\|_\pi}.$$

Indeed, the operator norm equals the largest eigenvalue (which is just 1 for a transition matrix  $P$ ), but we are interested in the second largest eigenvalue. Define the following operator

$$S_\pi(\sigma, \tau) := \pi(\tau). \quad (11)$$

It is easy to verify that  $S_\pi f(\sigma) = \langle f, \mathbf{1} \rangle_\pi$  for any  $\sigma$ . Thus, the only eigenvalues of  $S_\pi$  are 0 and 1, and the eigenspace of eigenvalue 0 is  $\{f \in L_2(\pi) : \langle f, \mathbf{1} \rangle_\pi = 0\}$ . This is exactly the union of eigenspaces of  $P$  excluding the eigenvalue 1. Hence, the operator norm of  $P - S_\pi$  equals the second largest eigenvalue of  $P$ , namely,

$$\lambda(P) = 1 - \|P - S_\pi\|_\pi. \quad (12)$$

The expression in (12) can be found in, for example, (Ullrich, 2014, Eq. (2.8)). In particular, using (12), we show that the definition (5) coincides with (3) when  $P$  is reversible.

**Proposition 7.** *Let  $P$  be the transition matrix of a reversible matrix with the stationary distribution  $\pi$ . Then*

$$\frac{1}{\lambda(P)} = \frac{1}{1 - \sqrt{1 - \lambda(R(P))}}.$$

*Proof.* Since  $P$  is reversible,  $P$  is self-adjoint, namely,  $P^* = P$ . Hence  $(P - S_\pi)^* = P^* - S_\pi$  and

$$\begin{aligned} (P - S_\pi)(P - S_\pi)^* &= (P - S_\pi)(P^* - S_\pi) \\ &= PP^* - PS_\pi - S_\pi P^* + S_\pi S_\pi \\ &= PP^* - S_\pi, \end{aligned}$$

where we use the fact that  $PS_\pi = S_\pi P^* = S_\pi S_\pi = S_\pi$ . It implies that

$$\begin{aligned} 1 - \lambda(R(P)) &= \|R(P) - S_\pi\|_\pi && \text{(by (12))} \\ &= \|PP^* - S_\pi\|_\pi \\ &= \|(P - S_\pi)(P - S_\pi)^*\|_\pi \\ &= \|P - S_\pi\|_\pi^2 \\ &= (1 - \lambda(P))^2. \end{aligned}$$

Rearranging the terms yields the claim.  $\square$

## C Proof of Theorem 1

The transition matrix of updating a particular variable  $x$  is the following

$$T_x(\sigma, \tau) = \begin{cases} \frac{\pi(\sigma^{x,s})}{\sum_{s \in S} \pi(\sigma^{x,s})} & \text{if } \tau = \sigma^{x,s} \text{ for some } s \in S; \\ 0 & \text{otherwise.} \end{cases} \quad (13)$$

Moreover, let  $I$  be the identity matrix that  $I(\sigma, \tau) = \mathbb{1}(\sigma, \tau)$ .

**Lemma 8.** *Let  $\pi$  be a bipartite distribution, and  $P_{RU}$ ,  $P_{AS}$ ,  $T_x$  be defined as above. Then we have that*

1.  $P_{RU} = \frac{I}{2} + \frac{1}{2n} \sum_{x \in V} T_x.$
2.  $P_{AS} = \prod_{i=1}^{n_1} T_{x_i} \prod_{j=1}^{n_2} T_{y_j}.$

*Proof.* Note that  $T_x$  is the transition matrix of resampling  $\sigma(x)$ . For  $P_{RU}$ , the term  $\frac{I}{2}$  comes from the fact that the chain is “lazy”. With the other  $1/2$  probability, we resample  $\sigma(x)$  for a uniformly chosen  $x \in V$ . This explains the term  $\frac{1}{2n} \sum_{x \in V} T_x$ .

For  $P_{AS}$ , we sequentially resample all variables in  $V_1$  and then all variables in  $V_2$ , which yields the expression.  $\square$

**Lemma 9.** *Let  $\pi$  be a bipartite distribution and  $T_x$  be defined as above. Then we have that*

1. *For any  $x \in V$ ,  $T_x$  is a self-adjoint operator and idempotent. Namely,  $T_x = T_x^*$  and  $T_x T_x = T_x$ .*
2. *For any  $x \in V$ ,  $\|T_x\|_\pi = 1$ .*
3. *For any  $x, x' \in V_i$  where  $i = 1$  or  $2$ ,  $T_x$  and  $T_{x'}$  commute. In other words  $T_{x'} T_x = T_x T_{x'}$  if  $x, x' \in V_i$  for  $i = 1$  or  $2$ .*

*Proof.* For Item 1, the fact that  $T_x$  is self-adjoint follows from the detailed balance condition (1). Idempotence is because updating the same vertex twice is the same as a single update.

Item 2 follows from Item 1. This is because

$$\|T_x\|_\pi = \|T_x T_x\|_\pi = \|T_x T_x^*\|_\pi = \|T_x\|_\pi^2.$$

For Item 3, suppose  $i = 1$ . Since  $\pi$  is bipartite, resampling  $x$  or  $x'$  only depends on  $\sigma_2$ . Therefore the ordering of updating  $x$  or  $x'$  does not matter as they are in the same partition.  $\square$

Define

$$P_{GS1} := \frac{I}{2} + \frac{1}{2n_1} \sum_{i=1}^{n_1} T_{x_i}, \quad \text{and} \quad P_{GS2} := \frac{I}{2} + \frac{1}{2n_2} \sum_{j=1}^{n_2} T_{y_j}.$$

Then, since  $n_1 + n_2 = n$ ,

$$P_{RU} = \frac{1}{n} (n_1 P_{GS1} + n_2 P_{GS2}). \tag{14}$$

Similarly, define

$$P_{AS1} := \prod_{i=1}^{n_1} T_{x_i}, \quad \text{and} \quad P_{AS2} := \prod_{j=1}^{n_2} T_{y_j}.$$

Then

$$P_{AS} = P_{AS1} P_{AS2}. \tag{15}$$

With this notation, Lemma 9 also implies the following.

**Corollary 10.** *The following holds:*

1.  $\|P_{AS1}\|_\pi \leq 1$  and  $\|P_{AS2}\|_\pi \leq 1$ .
2.  $P_{AS1} P_{GS1} = P_{AS1}$  and  $P_{GS2} P_{AS2} = P_{AS2}$ .

*Proof.* For Item 1, by the submultiplicity of operator norms:

$$\begin{aligned} \|P_{AS1}\|_\pi &= \left\| \prod_{i=1}^{n_1} T_{x_i} \right\|_\pi \leq \prod_{i=1}^{n_1} \|T_{x_i}\|_\pi \\ &= 1. \end{aligned}$$

(By Item 2 of Lemma 9)

The claim  $\|P_{AS2}\|_\pi \leq 1$  follows similarly.

Item 2 follows from Item 1 and 3 of Lemma 9. We verify the first case as follows.

$$\begin{aligned}
 P_{AS_1}P_{GS_1} &= \prod_{i=1}^{n_1} T_{x_i} \left( \frac{I}{2} + \frac{1}{2n_1} \sum_{j=1}^{n_1} T_{x_j} \right) \\
 &= \frac{1}{2} \cdot \prod_{i=1}^{n_1} T_{x_i} + \frac{1}{2n_1} \cdot \prod_{i=1}^{n_1} T_{x_i} \sum_{j=1}^{n_1} T_{x_j} \\
 &= \frac{1}{2} \cdot \prod_{i=1}^{n_1} T_{x_i} + \frac{1}{2n_1} \cdot \sum_{j=1}^{n_1} T_{x_j} \prod_{i=1}^{n_1} T_{x_i} \\
 &= \frac{1}{2} \cdot \prod_{i=1}^{n_1} T_{x_i} + \frac{1}{2n_1} \cdot \sum_{j=1}^{n_1} T_{x_1} T_{x_2} \cdots T_{x_j} T_{x_j} \cdots T_{x_{n_1}} && \text{(By Item 3 of Lemma 9)} \\
 &= \frac{1}{2} \cdot \prod_{i=1}^{n_1} T_{x_i} + \frac{1}{2n_1} \cdot \sum_{j=1}^{n_1} \prod_{i=1}^{n_1} T_{x_i} && \text{(By Item 1 of Lemma 9)} \\
 &= \frac{1}{2} \cdot \prod_{i=1}^{n_1} T_{x_i} + \frac{1}{2} \cdot \prod_{i=1}^{n_1} T_{x_i} \\
 &= P_{AS_1}.
 \end{aligned}$$

The other case is similar.  $\square$

Item 2 of Corollary 10 captures the following intuition: if we sequentially update all variables in  $V_i$  for  $i = 1, 2$ , then an extra individual update either before or after does not change the distribution. Recall Eq. (5).

**Lemma 11.** *Let  $\pi$  be a bipartite distribution and  $P_{RU}$  and  $P_{AS}$  be defined as above. Then we have that*

$$\|R(P_{AS}) - S_\pi\|_\pi \leq \|P_{RU} - S_\pi\|_\pi^2.$$

*Proof.* Recall (11), the definition of  $S_\pi$ , using which it is easy to see that

$$P_{AS_1}S_\pi = S_\pi P_{AS_2} = S_\pi S_\pi = S_\pi. \quad (16)$$

Thus,

$$\begin{aligned}
 P_{AS_1}(P_{RU} - S_\pi)P_{AS_2} &= P_{AS_1} \left( \frac{n_1}{n} P_{GS_1} + \frac{n_2}{n} P_{GS_2} - S_\pi \right) P_{AS_2} && \text{(By (14))} \\
 &= \frac{n_1}{n} P_{AS_1} P_{GS_1} P_{AS_2} + \frac{n_2}{n} P_{AS_1} P_{GS_2} P_{AS_2} - P_{AS_1} S_\pi P_{AS_2} \\
 &= \frac{n_1}{n} P_{AS_1} P_{AS_2} + \frac{n_2}{n} P_{AS_1} P_{AS_2} - S_\pi && \text{(By Item 2 of Cor 10)} \\
 &= P_{AS_1} P_{AS_2} - S_\pi \\
 &= P_{AS} - S_\pi, && (17)
 \end{aligned}$$

where in the last step we use (15). Moreover, we have that

$$\begin{aligned}
 P_{AS}^* &= \left( \prod_{i=1}^{n_1} T_{x_i} \prod_{j=1}^{n_2} T_{y_j} \right)^* \\
 &= \prod_{j=1}^{n_2} T_{y_{n_2+1-j}}^* \prod_{i=1}^{n_1} T_{x_{n_1+1-i}}^* \\
 &= \prod_{j=1}^{n_2} T_{y_{n_2+1-j}} \prod_{i=1}^{n_1} T_{x_{n_1+1-i}} && \text{(By Item 1 of Lemma 9)} \\
 &= \prod_{j=1}^{n_2} T_{y_j} \prod_{i=1}^{n_1} T_{x_i} && \text{(By Item 3 of Lemma 9)} \\
 &= P_{AS_2} P_{AS_1}.
 \end{aligned}$$

Hence, similarly to (17), we have that

$$\begin{aligned} P_{AS2}(P_{RU} - S_\pi)P_{AS1} &= P_{AS2}P_{AS1} - S_\pi \\ &= P_{AS}^* - S_\pi. \end{aligned} \quad (18)$$

Using (16), we further verify that

$$\begin{aligned} (P_{AS} - S_\pi)(P_{AS}^* - S_\pi) &= P_{AS}P_{AS}^* - P_{AS}S_\pi - S_\pi P_{AS}^* + S_\pi S_\pi \\ &= P_{AS}P_{AS}^* - S_\pi \end{aligned} \quad (19)$$

Combining (17), (18), and (19), we see that

$$\begin{aligned} \|R(P_{AS}) - S_\pi\|_\pi &= \|P_{AS}P_{AS}^* - S_\pi\|_\pi \\ &= \|(P_{AS} - S_\pi)(P_{AS}^* - S_\pi)\|_\pi \\ &= \|P_{AS1}(P_{RU} - S_\pi)P_{AS2}P_{AS2}(P_{RU} - S_\pi)P_{AS1}\|_\pi \\ &\leq \|P_{AS1}\|_\pi \|P_{RU} - S_\pi\|_\pi \|P_{AS2}\|_\pi \|P_{AS2}\|_\pi \|P_{RU} - S_\pi\|_\pi \|P_{AS1}\|_\pi \\ &\leq \|P_{RU} - S_\pi\|_\pi^2, \end{aligned}$$

where the first inequality is due to the submultiplicity of operator norms, and we use Item 1 of Corollary 10 in the last line.  $\square$

**Remark.** *The last inequality in the proof of Lemma 11 crucially uses the fact that the distribution is bipartite. If there are, say,  $k$  partitions, then the corresponding operators  $P_{AS1}, \dots, P_{ASk}$  do not commute and the proof does not generalize.*

*Proof of Theorem 1.* For the first part, notice that the alternating-scan sampler is aperiodic. Any possible state  $\sigma$  of the chain must be in the state space  $\Omega$ . Therefore  $\pi(\sigma) > 0$  and the probability of staying at  $\sigma$  is strictly positive. Moreover, any single variable update can be simulated in the scan sampler, with small but strictly positive probability. Hence if the random-update sampler is irreducible, then so is the scan sampler.

To show that  $T_{rel}(P_{AS}) \leq T_{rel}(P_{RU})$ , we have the following

$$\begin{aligned} T_{rel}(P_{AS}) &= \frac{1}{1 - \sqrt{1 - \lambda(R(P_{AS}))}} && \text{(By (5))} \\ &= \frac{1}{1 - \sqrt{\|R(P_{AS}) - S_\pi\|_\pi}} && \text{(By (12))} \\ &\leq \frac{1}{1 - \|P_{RU} - S_\pi\|_\pi} && \text{(By Lemma 11)} \\ &= \frac{1}{\lambda(P_{RU})} && \text{(By (12))} \\ &= T_{rel}(P_{RU}). && \text{(By (3))} \end{aligned}$$

This completes the proof.  $\square$
